# Supplementary material for: Identification of genes supporting cold resistance of mammalian cells: lessons from a hibernator
Source: PubMed Central journal article supplement (PMC11413375; doi:10.1038/s41419-024-07059-w), 2024-09-19

**Fig. 2a**

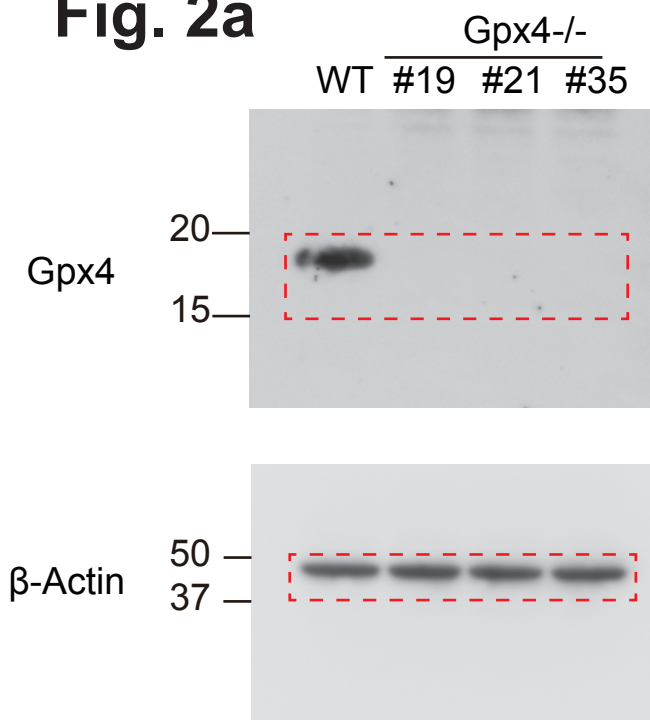

**Fig. 3a**

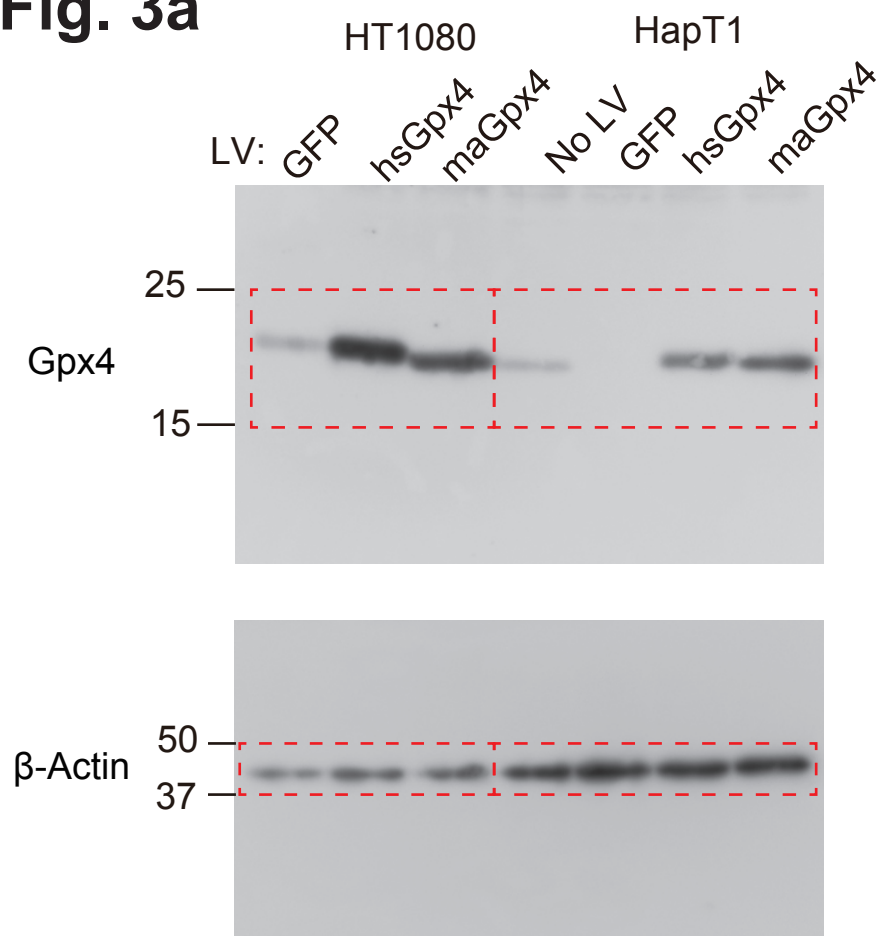

**Fig. 4a**

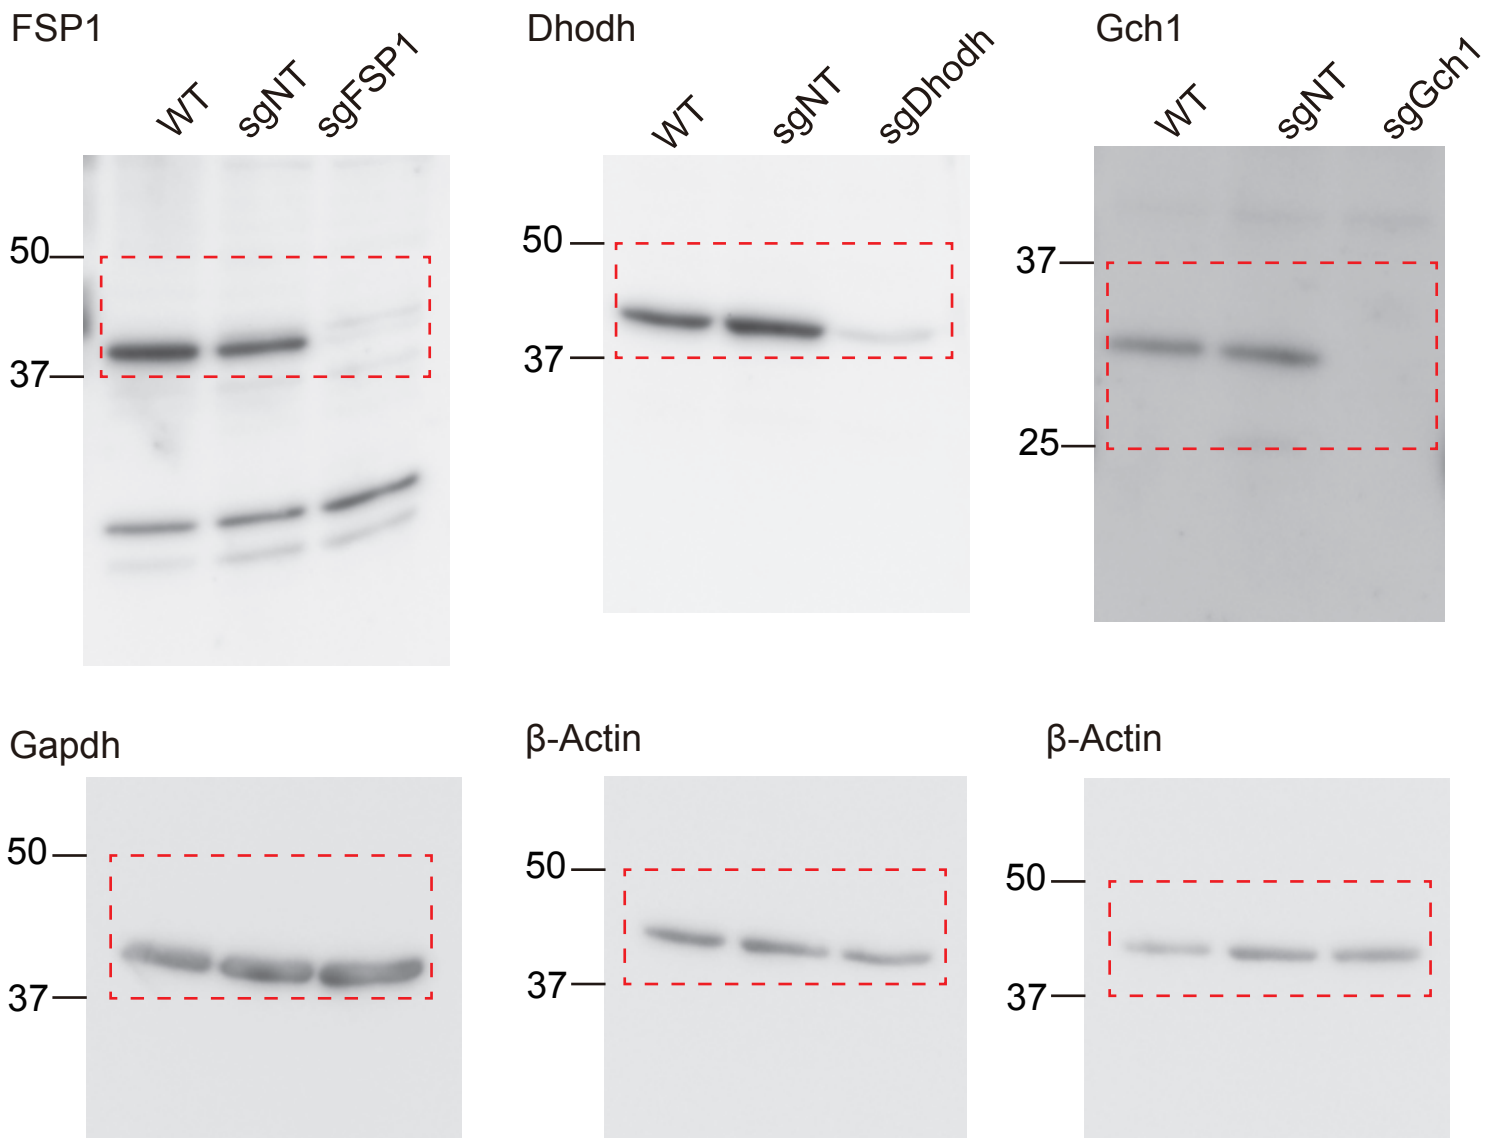

**Fig. 5g**

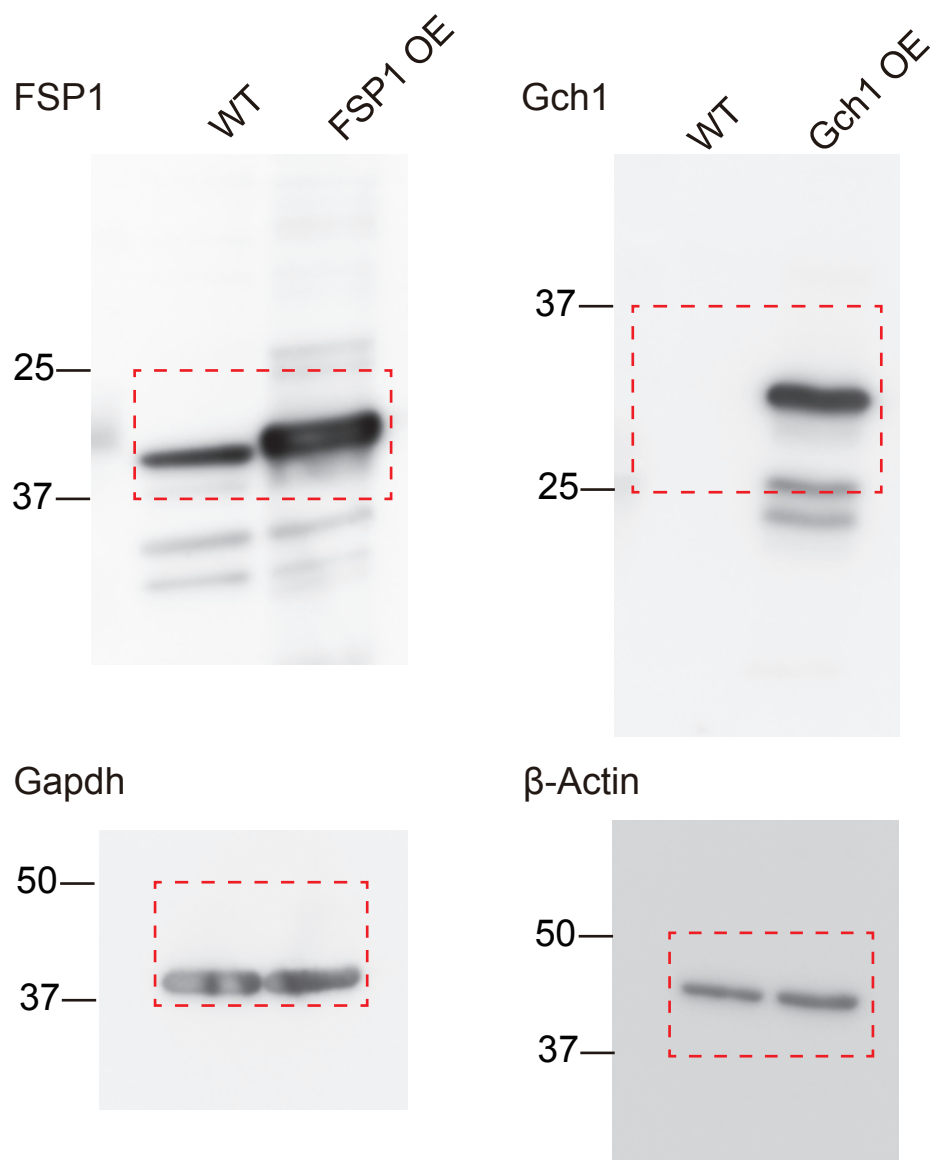

**Fig. 6b**

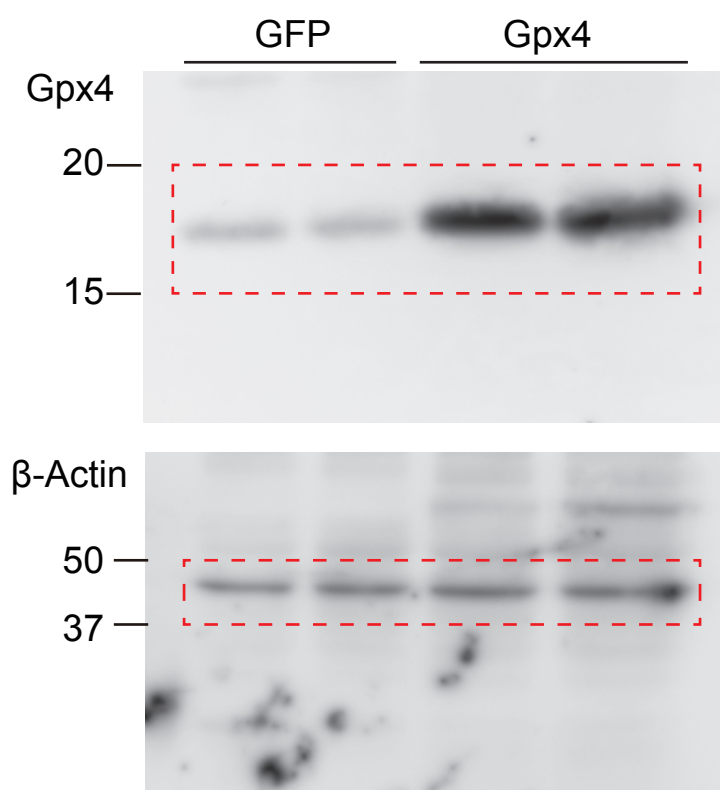



**Fig. S2d**

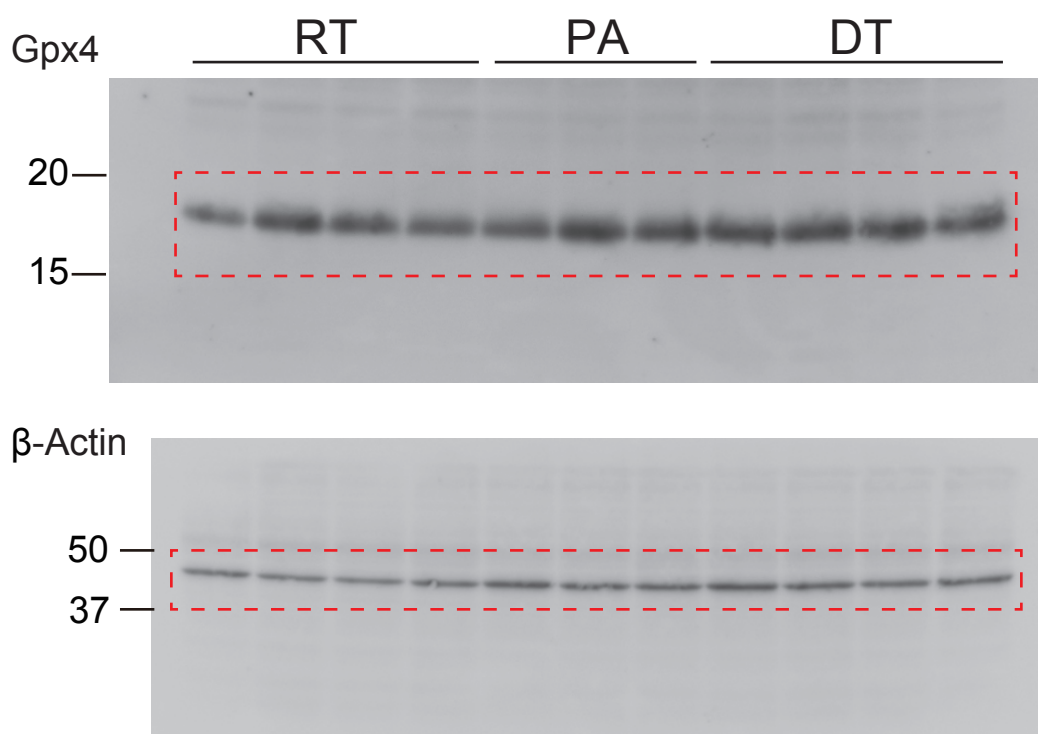

Supplement: 41419_2024_7059_MOESM3_ESM.pdf [file 41419_2024_7059_MOESM3_ESM.pdf]
